# Supplementary material for: Value of the Immunization Program for Children in the 2017 US Birth Cohort
Source: Oxford University Press journal article supplement (doi:10.1542/peds.2021-056007), 2022-07-13
Supplement: peds_2021056007supplementarydata.pdf [file peds_2021056007supplementarydata.pdf]

Supplemental Information: Detailed Model Input Parameters

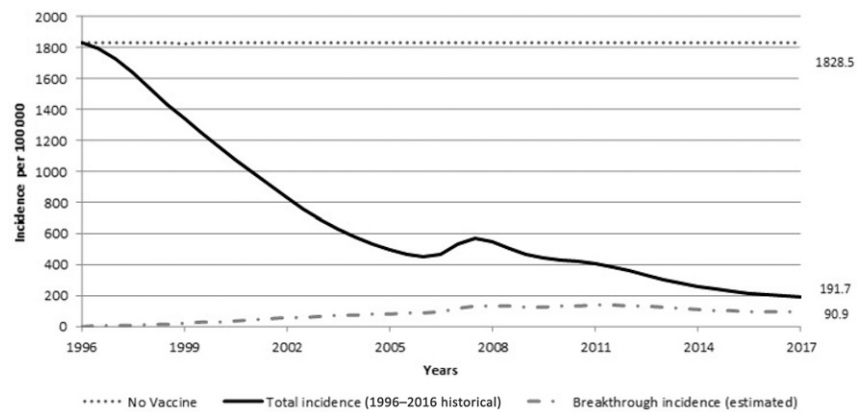

**SUPPLEMENTAL FIGURE 4**  
Projected natural and breakthrough varicella incidence in the United States, all ages, 1996 to 2017. Source: MSD data on file (2021). Data values shown are for 2017 and used to calculate the percentage of total varicella cases that are breakthrough cases.

**SUPPELEMENTAL TABLE 5** Incidence of Adverse Events per 100 000 Doses

| Adverse Event                                          | Incidence of Adverse Event per 100 000 Doses, by Vaccine |      |      |      |           |      |       |             |           |           |
|--------------------------------------------------------|----------------------------------------------------------|------|------|------|-----------|------|-------|-------------|-----------|-----------|
|                                                        | DTaP                                                     | HepA | HepB | Hib  | Influenza | MMR  | PCV13 | Polio (IPV) | Rotavirus | Varicella |
| Anaphylaxis                                            | 0.1                                                      | 0.1  | 0.1  | 0.1  | 0.1       | 0.1  | 0.1   | 0.1         | —         | 0.1       |
| Arthralgia                                             | —                                                        | —    | —    | —    | —         | 1000 | —     | —           | —         | —         |
| Aseptic meningitis                                     | —                                                        | —    | —    | —    | —         | 0.1  | —     | —           | —         | —         |
| Vaccine-related encephalitis                           | —                                                        | —    | —    | —    | —         | 0.1  | —     | —           | —         | —         |
| Guillain-Barre syndrome                                | —                                                        | —    | —    | —    | 0.1       | —    | —     | —           | —         | —         |
| Hypotonic hyporesponsive episodes                      | 8                                                        | —    | —    | —    | —         | —    | —     | —           | —         | —         |
| Injection site reaction (severe)                       | 2000                                                     | 2000 | 2000 | 2000 | 2000      | 2000 | 2000  | 2000        | —         | 2000      |
| Intussusception                                        | —                                                        | —    | —    | —    | —         | —    | —     | —           | 1         | —         |
| Mild complication (eg, fever, rash, systemic reaction) | —                                                        | —    | —    | —    | 925       | —    | —     | —           | —         | 1000      |
| Mild gastroenteritis or vomiting                       | —                                                        | —    | —    | —    | —         | —    | —     | —           | 225       | —         |
| Parotitis                                              | —                                                        | —    | —    | —    | —         | 1600 | —     | —           | —         | —         |
| Protracted crying or screaming                         | 63                                                       | —    | —    | —    | —         | —    | —     | —           | —         | —         |
| Seizure                                                | 10                                                       | —    | —    | —    | —         | 33   | 0.5   | —           | —         | —         |
| Thrombocytopenic purpura                               | —                                                        | —    | —    | —    | —         | 3    | —     | —           | —         | —         |

—, not applicable. Default adverse event incidence data were obtained from Ekwueme et al (2000)<sup>40</sup> and (Zhou et al 2005)<sup>6</sup> for DTaP; Meltzer et al (2001)<sup>41</sup> and Zhou et al (2014)<sup>14</sup> for HepA; Zhou et al (2014)<sup>7</sup> for Hep B; Zhou et al (2005)<sup>6</sup> for Hib; Prosser et al (2006)<sup>7</sup> for influenza; Zhou et al (2004)<sup>32</sup> for MMR; Zhou et al (2014)<sup>7</sup> for PCV13; Miller et al (1996)<sup>35</sup> and Zhou et al (2014)<sup>78</sup> for IPV; Widdowson et al (2007)<sup>34</sup> and Zhou et al (2014)<sup>7</sup> for rotavirus; and Zhou et al (2005)<sup>6</sup> and Zhou et al (2008)<sup>51</sup> for varicella vaccines. A rate of 1 anaphylaxis event per 1 000 000 doses was assumed for all injected vaccines (Bohlke et al 2003;<sup>77</sup> Erlewyn-Lajeunesse et al 2012;<sup>97</sup> McNeil et al 2016)<sup>116</sup>. Two percent of doses for all injected vaccines were assumed to cause severe injection site reactions per expert opinion and review of package inserts for pediatric vaccines.

**SUPPLEMENTAL TABLE 6** Costs and QALY Losses per Adverse Event

| Adverse Event (Vaccine)             | Cost per Adverse Event, USD <sup>a</sup> | QALY Loss per Adverse Event | Sources and Assumptions                                                                                                                                                                                                                                                                                                                                                                                                                                                                                                                                                                                                                                                                                                                                                                                                                                                                                                                                                                                                                                                                                                                                                           |
|-------------------------------------|------------------------------------------|-----------------------------|-----------------------------------------------------------------------------------------------------------------------------------------------------------------------------------------------------------------------------------------------------------------------------------------------------------------------------------------------------------------------------------------------------------------------------------------------------------------------------------------------------------------------------------------------------------------------------------------------------------------------------------------------------------------------------------------------------------------------------------------------------------------------------------------------------------------------------------------------------------------------------------------------------------------------------------------------------------------------------------------------------------------------------------------------------------------------------------------------------------------------------------------------------------------------------------|
| Anaphylaxis (all injected vaccines) | 7970                                     | 0.0200                      | The default cost for anaphylaxis was calculated based on the resource use from previous economic analyses of DTaP (Ekwueme et al 2000 <sup>41</sup> ; Zhou et al 2005). <sup>6</sup> These previous studies assumed that 100% of anaphylaxis patients were hospitalized and had an outpatient visit. The default QALY loss for anaphylaxis was obtained from Kamiya et al (2016), <sup>47</sup> citing Lee et al (2005). <sup>51</sup>                                                                                                                                                                                                                                                                                                                                                                                                                                                                                                                                                                                                                                                                                                                                            |
| Arthralgia (MMR)                    | 179                                      | 0.0001                      | Based on resource use from a previous economic analysis of MMR (Zhou et al 2004), <sup>33</sup> which assumed that 1% of patients were hospitalized with a mean of 0.5 outpatient visits. Assumed same QALY loss as mild complication, which was obtained from Tu et al (2014). <sup>48</sup>                                                                                                                                                                                                                                                                                                                                                                                                                                                                                                                                                                                                                                                                                                                                                                                                                                                                                     |
| Aseptic meningitis (MMR)            | 7210                                     | 0.0232                      | Based on resource use from a previous economic analysis of MMR (Zhou et al 2004), <sup>33</sup> which assumed that 25% of patients were hospitalized with a mean of 1.3 outpatient visits. The default disutility for aseptic meningitis was assumed to be the same as the utility loss for meningitis caused by invasive pneumococcal disease, which was reported in Rubin et al (2010). <sup>45</sup>                                                                                                                                                                                                                                                                                                                                                                                                                                                                                                                                                                                                                                                                                                                                                                           |
| Vaccine-related encephalitis (MMR)  | 44 558                                   | 0.0539                      | Based on resource use from a previous economic analysis of MMR (Zhou et al 2004), <sup>33</sup> which assumed that 100% of patients were hospitalized with a mean of 3.62 outpatient visits. The default QALY loss was calculated by adding the QALY loss for acute encephalitis and for encephalitis that results in lifetime disability. The QALY for acute encephalitis was obtained from Anyiwe et al (2019) <sup>46</sup> which assumed a disutility value of 0.21 for a 2 wk duration, resulting in a QALY loss of 0.01. The disutility for encephalitis that results in lifetime disability was obtained from Philipson et al (2017; citing WHO [2004]) <sup>52</sup> which assumed a disutility of 0.56. The model assumed that this disutility would occur for the remaining 50 wk of the year, resulting in a QALY loss of 0.54. Fowler et al (2010) <sup>53</sup> reported that 8.5% of encephalitis cases result in long-term disability. This percentage was applied to the QALY loss for encephalitis resulting in long-term disability and then added to the QALY loss for acute encephalitis to calculate the assumed QALY loss for vaccine-related encephalitis. |

**SUPPLEMENTAL TABLE 6** Continued

| Adverse Event (Vaccine)                                                         | Cost per Adverse Event, USD <sup>a</sup> | QALY Loss per Adverse Event | Sources and Assumptions                                                                                                                                                                                                                                                                                                                                                                                                                  |
|---------------------------------------------------------------------------------|------------------------------------------|-----------------------------|------------------------------------------------------------------------------------------------------------------------------------------------------------------------------------------------------------------------------------------------------------------------------------------------------------------------------------------------------------------------------------------------------------------------------------------|
| Guillain-Barre syndrome (influenza)                                             | 32 882                                   | 0.1410                      | Obtained from a previous cost-effectiveness model for influenza (Prosser et al 2006) <sup>43</sup> and inflated from 2003 to 2019 USD using the US PCE health care inflation factor. The default QALY loss for Guillain-Barre syndrome was obtained from Prosser et al (2006). <sup>43</sup>                                                                                                                                             |
| Hypotonic hyporesponsive episodes (DTaP)                                        | 1622                                     | 0.0001                      | Based on resource use of DTaP-related episodes reported by Ekwueme et al (2000) <sup>41</sup> and Zhou et al (2005), <sup>6</sup> which reported that 12.5% of patients are hospitalized and 50% of patients have an outpatient visit. The default disutility and duration of disutility for hypotonic hyporesponsive episodes was assumed to be the same as a mild complication, which was obtained from Tu et al (2014). <sup>48</sup> |
| Injection site reaction (severe) (all injected vaccines)                        | 75                                       | 0.0014                      | Based on a previous cost-effectiveness model for influenza, which assumed a physician visit for an injection site reaction (Prosser et al 2006). <sup>43</sup> The default disutility and duration was assumed to be 0.5 for 1 day per expert opinion, which is similar to QALY loss for injection site reaction for Tdap vaccine in adolescents (0.001) (Kamiya et al 2016). <sup>47</sup>                                              |
| Intussusception (rotavirus)                                                     | 6094                                     | 0.0232                      | Obtained from a previous economic analysis of rotavirus vaccine (Widdowson et al 2007) <sup>35</sup> and inflated from 2004 to 2019 USD using the US PCE healthcare inflation factor. The default QALY loss was assumed the same as aseptic meningitis (Rubin et al 2010). <sup>45</sup>                                                                                                                                                 |
| Mild complication (eg, fever, rash, systematic reaction) (influenza, pertussis) | 75                                       | 0.0001                      | Based on resource use from a previous economic analysis of varicella vaccine (Zhou et al 2008), <sup>32</sup> which assumed an outpatient visit. The default QALY loss for a mild complication was based on fever obtained from Tu et al (2014). <sup>48</sup>                                                                                                                                                                           |
| Mild gastroenteritis or vomiting (rotavirus)                                    | 75                                       | 0.0006                      | Obtained from a previous economic analysis of rotavirus vaccine (Widdowson et al 2007) <sup>35</sup> and inflated from 2004 to 2019 USD using the US PCE healthcare inflation factor. The default disutility for mild gastroenteritis or vomiting of 0.219 was based on the disutility for nonhospitalized diarrhea (Martin et al 2009). <sup>50</sup> The default duration applied was 1-day per expert opinion.                        |
| Parotitis (MMR)                                                                 | 141                                      | 0.0002                      | Based on resource use from a previous economic analysis of MMR (Zhou et al 2004), <sup>33</sup> which assumed that 1% of patients were hospitalized with a mean of 0.1 outpatient visits. The default QALY loss for parotitis was assumed to be slightly higher than mild complication per expert opinion.                                                                                                                               |
| Protracted crying or screaming (DTaP)                                           | 31                                       | 0.0001                      | Based on resource use of DTaP-related protracted crying or screaming reported by Ekwueme et al (2000) <sup>41</sup> and Zhou et al (2005), <sup>6</sup> which reported that 0.5% of patients are hospitalized and 10% of patients have an outpatient visit. The default QALY loss for protracted crying or screaming was assumed to be the same as a mild complication (Tu et al 2014). <sup>48</sup>                                    |
| Seizure (DTaP, MMR, PCV13)                                                      | 891                                      | 0.0004                      | Based on resource use from a previous economic analysis of MMR (Zhou et al 2004), <sup>33</sup> which assumed that 10% of patients were hospitalized with a mean of 1 outpatient visit. The default QALY loss for a seizure was obtained from Tu et al (2014). <sup>48</sup>                                                                                                                                                             |
| Thrombocytopenic purpura (MMR)                                                  | 14 098                                   | 0.0232                      | Based on resource use from a previous economic analysis of MMR (Zhou et al 2004), <sup>33</sup> which assumed that 40% of patients were hospitalized with a mean of 5.91 outpatient visits. The default QALY loss for thrombocytopenic purpura was assumed to be the same as aseptic meningitis (Rubin et al 2010). <sup>45</sup>                                                                                                        |

CMS, Centers for Medicare and Medicaid Services; CPT, Current Procedural Terminology; PCE, personal consumption expenditures.

<sup>a</sup> Hospitalization costs (if applicable) were obtained from Zhou et al (2004)<sup>33</sup> and inflated from 2001 to 2019 USD using the US PCE health care inflation factor. Outpatient visit costs (if applicable) were obtained from the 2019 Physician Fee Schedule (CPT 99213) (CMS.gov, 2019)<sup>50</sup>.

**SUPPLEMENTAL TABLE 7** Diphtheria Case Severity Distribution, Disease-Related Deaths, and Direct Medical Costs per Case

| Case Severity                                             | Case Severity Distribution, % | Sources                            | Cost per Case, USD | Sources                                                                             |
|-----------------------------------------------------------|-------------------------------|------------------------------------|--------------------|-------------------------------------------------------------------------------------|
| Hospitalized case                                         | 100.0                         | Ekwueme et al (2000) <sup>41</sup> | 14 994.66          | Ekwueme et al (2000) <sup>41</sup> citing Hatziaandreu et al (1994) <sup>104a</sup> |
| Outpatient case                                           | 0.0                           |                                    | NA                 |                                                                                     |
| Percentage of medically attended cases resulting in death | 10.0                          | Zhou et al (2005) <sup>6</sup>     | NA                 | NA                                                                                  |

NA, not applicable; PCE, personal consumption expenditures.

<sup>a</sup> Inflated to 2019 USD using the US PCE health care inflation factor.**SUPPLEMENTAL TABLE 8** Hepatitis A Case Severity Distribution, Disease-Related Deaths, and Direct Medical Costs per Case

| Case Severity                                      | Case Severity Distribution, % |        |         |         |       | Sources                                                                                                           | Cost per Case, USD                                                       | Sources                                                                      |
|----------------------------------------------------|-------------------------------|--------|---------|---------|-------|-------------------------------------------------------------------------------------------------------------------|--------------------------------------------------------------------------|------------------------------------------------------------------------------|
|                                                    | 0–4 y                         | 5–14 y | 15–39 y | 40–59 y | ≥60 y |                                                                                                                   |                                                                          |                                                                              |
| Icteric infection                                  | 7.6                           | 51.2   | 83.2    | 83.2    | 83.2  | Rein et al (2007) <sup>45</sup> and                                                                               | NA                                                                       | NA                                                                           |
| Hospitalized case (not fulminant)                  | 5.0                           | 17.0   | 23.0    | 23.0    | 23.0  | Dhankhar et al (2015) <sup>96</sup> citing Armstrong and Bell (2002) <sup>74</sup> and CDC (2001) <sup>81</sup>   | 12 091.79                                                                | Dhankhar et al (2015) <sup>96</sup> citing Rein et al (2007) <sup>130a</sup> |
| Fulminant case (without transplant)                | 0.052                         | 0.007  | 0.093   | 0.755   | 1.098 |                                                                                                                   | 35 985.13                                                                |                                                                              |
| Liver transplant                                   | 0.010                         | 0.001  | 0.017   | 0.142   | 0.027 |                                                                                                                   | 376 104 (year of transplant) and 33 674 (annual cost remaining lifetime) | Berge et al (2000) <sup>77</sup>                                             |
| Outpatient case                                    | 94.4                          | 83.0   | 76.9    | 76.1    | 75.9  |                                                                                                                   | 1223.80                                                                  | Dhankhar et al (2015) <sup>96</sup> citing Rein et al (2007) <sup>130a</sup> |
| Anicteric and asymptomatic infection               | 92.4                          | 48.8   | 16.8    | 16.8    | 16.8  |                                                                                                                   | NA                                                                       |                                                                              |
| NMA case                                           | 100.0                         | 100.0  | 100.0   | 100.0   | 100.0 |                                                                                                                   | 0                                                                        | Assumed                                                                      |
| Percentage of cases resulting in death             |                               |        |         |         |       | Dhankhar et al (2015) <sup>96</sup> citing Rein et al (2007) <sup>130</sup> and Wolfe et al (2009) <sup>139</sup> |                                                                          |                                                                              |
| Icteric infection                                  | 0.008                         | 0.001  | 0.014   | 0.109   | 0.736 |                                                                                                                   | NA                                                                       | NA                                                                           |
| Anicteric infection                                | 0.000                         | 0.000  | 0.000   | 0.000   | 0.000 |                                                                                                                   | NA                                                                       | NA                                                                           |
| Percentage of liver transplants resulting in death |                               |        |         |         |       |                                                                                                                   |                                                                          |                                                                              |
| Year of transplant                                 | 11.6                          | 11.6   | 11.6    | 11.6    | 11.6  |                                                                                                                   | NA                                                                       | NA                                                                           |
| Subsequent years                                   | 4.4                           | 4.4    | 4.4     | 4.4     | 4.4   |                                                                                                                   | NA                                                                       |                                                                              |

CDC, Centers for Disease Control and Prevention; PCE, personal consumption expenditures; NA, not applicable; NMA, nonmedically attended.

<sup>a</sup> Inflated to 2019 USD using the US PCE health care inflation factor.

**SUPPLEMENTAL TABLE 9** Hepatitis B Case Severity Distribution, Disease-Related Deaths, and Direct Medical Costs per Case

| Case Severity                                                                              | Case Severity Distribution, % |         |       |        |       | Sources                                                                                                                                                                                                                                       | Cost per Case, USD                                                    | Sources                                                                                                     |
|--------------------------------------------------------------------------------------------|-------------------------------|---------|-------|--------|-------|-----------------------------------------------------------------------------------------------------------------------------------------------------------------------------------------------------------------------------------------------|-----------------------------------------------------------------------|-------------------------------------------------------------------------------------------------------------|
|                                                                                            | <1 m                          | 1 m–1 y | 1–4 y | 5–14 y | ≥15 y |                                                                                                                                                                                                                                               |                                                                       |                                                                                                             |
| Acute symptomatic                                                                          | 1.0                           | 6.0     | 6.0   | 30.0   | 30.0  | Zhou et al (2005) <sup>6</sup>                                                                                                                                                                                                                |                                                                       | Miriti et al (2008) <sup>118a</sup>                                                                         |
| Fulminant case                                                                             | 0.1                           | 0.1     | 0.6   | 0.6    | 0.6   | citing Margolis et al (1995) <sup>114</sup>                                                                                                                                                                                                   | 22 899                                                                |                                                                                                             |
| Hospitalized case                                                                          | 62.7                          | 62.7    | 62.2  | 62.2   | 62.2  |                                                                                                                                                                                                                                               | 10 631                                                                |                                                                                                             |
| Outpatient case (jaundice)                                                                 | 37.2                          | 37.2    | 37.2  | 37.2   | 37.2  |                                                                                                                                                                                                                                               | 483                                                                   |                                                                                                             |
| Acute symptomatic                                                                          | 99.0                          | 94.0    | 94.0  | 70.0   | 70.0  |                                                                                                                                                                                                                                               | 0.00                                                                  |                                                                                                             |
| Percentage of cases resulting in long-term sequelae                                        |                               |         |       |        |       |                                                                                                                                                                                                                                               |                                                                       |                                                                                                             |
| Chronic HepB (among acute cases)                                                           | 90.0                          | 90.0    | 30.0  | 6.0    | 6.0   | CDC (Pertusis) <sup>85</sup>                                                                                                                                                                                                                  | NA                                                                    | NA                                                                                                          |
| Liver transplant (among fulminant cases)                                                   | 12.0                          | 12.0    | 12.0  | 12.0   | 12.0  | Miriti et al (2008) <sup>118</sup>                                                                                                                                                                                                            | 164 779 (year of transplant); 31 948 (annual cost remaining lifetime) | Nguyen et al (2019) <sup>124</sup> and Berge et al (2000) <sup>77</sup>                                     |
| Percentage of fulminant cases resulting in death                                           | 70.0                          | 70.0    | 70.0  | 70.0   | 70.0  | Zhou et al (2005) <sup>6</sup> citing Mulley et al (1982) <sup>120</sup> , Bloom et al (1993) <sup>65</sup> , Margolis et al (1995) <sup>114</sup> , Arevalo and Washington (1988) <sup>73</sup> , and Krahn and Detsky (1993) <sup>107</sup> | NA                                                                    | NA                                                                                                          |
| Annual transitions from chronic HepB and associated complications                          |                               |         |       |        |       |                                                                                                                                                                                                                                               |                                                                       |                                                                                                             |
| Chronic HepB                                                                               |                               |         |       |        |       | Miriti et al (2008) <sup>118</sup>                                                                                                                                                                                                            |                                                                       |                                                                                                             |
| Compensated cirrhosis                                                                      | 0.5                           | 0.5     | 0.5   | 0.5    | 0.5   |                                                                                                                                                                                                                                               | NA                                                                    | NA                                                                                                          |
| HCC                                                                                        | 0.02                          | 0.02    | 0.02  | 0.02   | 0.02  |                                                                                                                                                                                                                                               | NA                                                                    | NA                                                                                                          |
| Compensated cirrhosis                                                                      |                               |         |       |        |       |                                                                                                                                                                                                                                               | 24 562                                                                | Nguyen et al (2019) <sup>124a</sup>                                                                         |
| Decompensated cirrhosis                                                                    | 3.4                           | 3.4     | 3.4   | 3.4    | 3.4   |                                                                                                                                                                                                                                               |                                                                       |                                                                                                             |
| HCC                                                                                        | 2.5                           | 2.5     | 2.5   | 2.5    | 2.5   |                                                                                                                                                                                                                                               |                                                                       |                                                                                                             |
| Death                                                                                      | 3.8                           | 3.8     | 3.8   | 3.8    | 3.8   |                                                                                                                                                                                                                                               |                                                                       |                                                                                                             |
| Decompensated cirrhosis                                                                    |                               |         |       |        |       |                                                                                                                                                                                                                                               | 152 096                                                               | Nguyen et al (2019) <sup>124a</sup>                                                                         |
| HCC                                                                                        | 2.5                           | 2.5     | 2.5   | 2.5    | 2.5   |                                                                                                                                                                                                                                               |                                                                       |                                                                                                             |
| Liver transplant                                                                           | 1.0                           | 1.0     | 1.0   | 1.0    | 1.0   |                                                                                                                                                                                                                                               |                                                                       |                                                                                                             |
| Death                                                                                      | 26.4                          | 26.4    | 26.4  | 26.4   | 26.4  |                                                                                                                                                                                                                                               |                                                                       |                                                                                                             |
| HCC                                                                                        |                               |         |       |        |       |                                                                                                                                                                                                                                               | 117 153                                                               | Nguyen et al (2019) <sup>124a</sup>                                                                         |
| Liver transplant                                                                           | 2.0                           | 2.0     | 2.0   | 2.0    | 2.0   |                                                                                                                                                                                                                                               |                                                                       |                                                                                                             |
| Death                                                                                      | 71.1                          | 71.1    | 71.1  | 71.1   | 71.1  |                                                                                                                                                                                                                                               |                                                                       |                                                                                                             |
| Annual probability of hospitalization for acute exacerbation among those with chronic HepB | 0.1                           | 0.1     | 0.1   | 0.1    | 0.1   |                                                                                                                                                                                                                                               | 18 391                                                                | Miriti et al (2008) <sup>118</sup> citing US Department of Health and Human Services (2003) <sup>135a</sup> |
| Percentage of liver transplants resulting in death                                         |                               |         |       |        |       |                                                                                                                                                                                                                                               | NA                                                                    | NA                                                                                                          |
| Year of transplant                                                                         | 11.6                          | 11.6    | 11.6% | 11.6   | 11.6  | Dhankhar et al (2015) <sup>9</sup>                                                                                                                                                                                                            | NA                                                                    | NA                                                                                                          |
| Subsequent years                                                                           | 4.4                           | 4.4     | 4.4%  | 4.     | 4.4   | citing Wolfe et al (2009) <sup>139</sup>                                                                                                                                                                                                      | NA                                                                    | NA                                                                                                          |

CDC, Centers for Disease Control and Prevention; HCC, hepatocellular carcinoma; HepB, hepatitis B; NA, not applicable; USD, United States dollars.

<sup>a</sup> Inflated to 2019 USD using the US PCE health care inflation factor.

**SUPPLEMENTAL TABLE 10** Hib Case Severity Distribution, Disease-Related Deaths, and Direct Medical Costs per Case

| Case Severity                                                      | Case Severity Distribution, % |        |      |             |        |      | Sources                                                                  | Cost per Case, USD                                                             | Sources                                                                                                                      |
|--------------------------------------------------------------------|-------------------------------|--------|------|-------------|--------|------|--------------------------------------------------------------------------|--------------------------------------------------------------------------------|------------------------------------------------------------------------------------------------------------------------------|
|                                                                    | Prevaccine                    |        |      | Postvaccine |        |      |                                                                          |                                                                                |                                                                                                                              |
|                                                                    | 0–5 m                         | 6–11 m | ≥1 y | 0–5 m       | 6–11 m | ≥1 y |                                                                          |                                                                                |                                                                                                                              |
| Meningitis case                                                    | 68.2                          | 65.1   | 54.6 | 39.6        | 54.9   | 32.3 | Zhou et al (2002) <sup>141</sup>                                         | 29 055                                                                         | Rubin et al (2010) <sup>45</sup> citing Ray et al (2006) <sup>129</sup> and Stoecker et al (2016) <sup>132a</sup>            |
| Epiglottitis case                                                  | 0.7                           | 0.7    | 19.4 | 0.0         | 0.0    | 3.2  |                                                                          | 15 831                                                                         | Zhou et al (2002) <sup>141</sup> citing Boyle et al (1994) <sup>79a</sup>                                                    |
| Bacteremia case                                                    | 8.6                           | 9.5    | 6.7  | 32.2        | 18.5   | 29.8 |                                                                          | 20 246                                                                         |                                                                                                                              |
| Pneumonia case                                                     | 9.6                           | 10.5   | 7.5  | 7.9         | 2.8    | 9.2  |                                                                          | 16 423                                                                         |                                                                                                                              |
| Cellulitis case                                                    | 10.5                          | 11.6   | 8.2  | 2.3         | 2.8    | 5.7  |                                                                          | 5940                                                                           |                                                                                                                              |
| Arthritis case                                                     | 1.6                           | 1.7    | 2.4  | 0.0         | 1.4    | 0.4  |                                                                          | 4211                                                                           |                                                                                                                              |
| Other invasive case                                                | 0.8                           | 0.9    | 1.2  | 18.1        | 19.7   | 19.4 |                                                                          | 13 706                                                                         |                                                                                                                              |
| Percentage of Hib meningitis cases resulting in long-term sequelae |                               |        |      |             |        |      |                                                                          |                                                                                | Zhou et al (2002) <sup>141</sup> citing Prouty and Lakin (2000) <sup>128</sup> and Chambers and Wolman (1998) <sup>92a</sup> |
| Major cognitive difficulties                                       | 9.3                           | 9.3    | 9.3  | 9.3         | 9.3    | 9.3  | (Christie et al 2017) <sup>94</sup>                                      | 121 509 (annual cost for 50 y)                                                 |                                                                                                                              |
| Major hearing loss                                                 | 8.2                           | 8.2    | 8.2  | 8.2         | 8.2    | 8.2  | (Jit, 2010)                                                              | 25 188 (special education cost applied from ages 3–18 y); 46 766 (1-time cost) |                                                                                                                              |
| Percentage of Hib cases resulting in death                         | 3.8                           | 3.8    | 3.8  | 3.8         | 3.8    | 3.8  | Zhou et al (2002) <sup>141</sup> citing Cochi et al (1985) <sup>95</sup> | NA                                                                             |                                                                                                                              |

NA, not applicable; PCE, personal consumption expenditures.

<sup>a</sup> Inflated to 2019 USD using the US PCE health care inflation factor.**SUPPLEMENTAL TABLE 11** Influenza Case Severity Distribution, Disease-Related Deaths, and Direct Medical Costs per Case

| Case Severity                                             | Case Severity Distribution, % |        | Sources                            | Cost Per Case, USD |                                   | Sources                              |
|-----------------------------------------------------------|-------------------------------|--------|------------------------------------|--------------------|-----------------------------------|--------------------------------------|
|                                                           | 0–4 y                         | 5–10 y |                                    | 0–4 y              | 5–10 y                            |                                      |
| Hospitalized case                                         | 0.7                           | 0.7    | Hart et al (2018) <sup>102</sup>   | 41 480.90          | 18 782.46                         | Hart et al (2018) <sup>102a</sup>    |
| ED visit case                                             | 8.2                           | 14.0   |                                    | 711.65             | 614.80                            | Talbird et al (2017) <sup>134a</sup> |
| Outpatient case                                           | 51.0                          | 38.6   | 531.08                             | 334.33             | Hart et al (2018) <sup>102a</sup> |                                      |
| NMA case                                                  | 40.1                          | 46.7   | NA                                 | 0.00               | 0.00                              | NA                                   |
| Percentage of medically attended cases resulting in death | 0.02                          | 0.02   | Rolfes et al (2019) <sup>131</sup> | NA                 | NA                                | NA                                   |

ED, emergency department; PCE, personal consumption expenditures; NA, not applicable; NMA, nonmedically attended.

<sup>a</sup> Inflated to 2019 USD using the US PCE health care inflation factor.

**SUPPLEMENTAL TABLE 12** Measles Case Severity Distribution, Disease-Related Deaths, and Direct Medical Costs per Case

| Case Severity                                                      | Case Severity Distribution, % |      |       |        |       | Cost per Case, USD                         |        |        |        |        | Sources                          |
|--------------------------------------------------------------------|-------------------------------|------|-------|--------|-------|--------------------------------------------|--------|--------|--------|--------|----------------------------------|
|                                                                    | <1 y                          | 1 y  | 2–4 y | 5–19 y | ≥20 y | <1 y                                       | 1 y    | 2–4 y  | 5–19 y | ≥20 y  |                                  |
| Encephalitis case                                                  | 0.1                           | 0.1  | 0.1   | 0.1    | 0.2   | 46 076                                     | 46 076 | 46 076 | 46 076 | 46 076 | Zhou et al (2004) <sup>33a</sup> |
| Pneumonia case                                                     | 7.0                           | 7.2  | 5.2   | 1.6    | 4.7   | 16 340                                     | 16 084 | 14 470 | 12 438 | 15 074 |                                  |
| Otitis media case                                                  | 12.0                          | 13.5 | 8.7   | 2.2    | 1.4   | 1450                                       | 1356   | 1258   | 770    | 1500   |                                  |
| Uncomplicated or diarrhea case                                     | 81.0                          | 79.2 | 86.0  | 96.1   | 1.4   | 638                                        | 492    | 230    | 548    |        |                                  |
| Percentage of encephalitis cases resulting in long-term disability | 8.5                           | 8.5  | 8.5   | 8.5    | 8.5   | 128 114 (annual cost for duration of 50 y) |        |        |        |        | Zhou et al (2008) <sup>32a</sup> |
| Percentage of reported cases resulting in death                    | 0.08                          | 0.08 | 0.08  | 0.08   | 0.08  | NA                                         | NA     | NA     | NA     | NA     | NA                               |

NA, not applicable; PCE, personal consumption expenditures.

<sup>a</sup> Inflated to 2019 USD using the US PCE healthcare inflation factor.

**SUPPLEMENTAL TABLE 13** Mumps Case Severity Distribution, Disease-Related Deaths, and Direct Medical Costs per Case

| Case Severity                                   | Case Severity Distribution, % |       | Sources                         | Cost Per Case, USD |         | Sources                          |
|-------------------------------------------------|-------------------------------|-------|---------------------------------|--------------------|---------|----------------------------------|
|                                                 | <15 y                         | ≥15 y |                                 | <15 y              | ≥15 y   |                                  |
| Complicated case                                | 11.5                          | 48.5  | Zhou et al (2004) <sup>33</sup> | 5882.90            | 1850.04 | Zhou et al (2004) <sup>33a</sup> |
| Uncomplicated case                              | 88.5                          | 51.5  |                                 | 151.98             | 151.98  |                                  |
| Percentage of reported cases resulting in death | 0.001                         | 0.001 | Zhou et al (2004) <sup>33</sup> | NA                 | NA      |                                  |

NA, not applicable; PCE, personal consumption expenditures.

<sup>a</sup> Inflated to 2019 USD using the US PCE healthcare inflation factor.

**SUPPLEMENTAL TABLE 14** Pertussis Case Severity Distribution, Disease-Related Deaths, and Costs per Case

| Case Severity                                             | Case Severity Distribution, % | Sources                                                                                                                      | Cost per Case, USD | Sources                             |
|-----------------------------------------------------------|-------------------------------|------------------------------------------------------------------------------------------------------------------------------|--------------------|-------------------------------------|
| Hospitalized case                                         | 4.5                           | Ekwueme et al (2000) <sup>41</sup><br>citing Farizo et al (1992) <sup>99</sup><br>and Sutter and Cochi (1992) <sup>133</sup> | 15 178.71          | Ekwueme et al (2000) <sup>41a</sup> |
| Outpatient case                                           | 95.5                          | 91.20                                                                                                                        |                    |                                     |
| Percentage of medically-attended cases resulting in death | 0.04                          | CDC (Pertusis) <sup>90</sup>                                                                                                 | NA                 |                                     |

CDC, Centers of Disease Control and Prevention; PCE, personal consumption expenditures; NA, not applicable; NMA, nonmedically attended.

<sup>a</sup> Inflated to 2019 USD using the US PCE healthcare inflation factor.

PEDIATRICS Volume 150, number 3, September 2022

9

<sup>a</sup> Case severity distribution for IPD and pneumococcal pneumonia determined from disease incidence data.

<sup>a</sup> Case severity distribution for IPD and pneumococcal pneumonia determined from disease incidence data.

<sup>2</sup> Inflated to 2019 USD using the US PCE healthcare inflation factor.

**SUPPLEMENTAL TABLE 16** Polio Case Severity Distribution, Disease-Related Deaths, and Direct Medical Costs per Case

| Case Severity                                                  | Case Severity Distribution, % | Sources                                                             | Cost per Case, USD                          | Sources                                                              |
|----------------------------------------------------------------|-------------------------------|---------------------------------------------------------------------|---------------------------------------------|----------------------------------------------------------------------|
| Paralytic case                                                 | 100.0                         | Roush and Murphy (2007) <sup>4</sup><br>and CDC (1999) <sup>5</sup> | 71 927                                      | Duintjer Tebbens et al (2010) <sup>97a</sup>                         |
| Nonparalytic case                                              | 0.0                           | 0.00                                                                | CDC (2015) <sup>84</sup>                    |                                                                      |
| Percentage of paralytic cases resulting in permanent paralysis | 0.5                           | WHO (2019) <sup>138</sup>                                           | 73 292 (annual cost for remaining lifetime) | National Spinal Cord Injury Statistics Center (2016) <sup>123a</sup> |
| Percentage of paralytic cases resulting in death               | 2.0                           | CDC (2015) <sup>84</sup>                                            | NA                                          | NA                                                                   |

CDC, Centers for Disease Control and Prevention; PCE, personal consumption expenditures; NA, not applicable; WHO, World Health Organization.

<sup>a</sup> Inflated to 2019 USD using the US PCE healthcare inflation factor.

**SUPPLEMENTAL TABLE 17** Rotavirus Case Severity Distribution, Disease-Related Deaths, and Direct Medical Costs per Case

| Case Severity <sup>a</sup>                                | Case Severity Distribution | Sources                              | Cost per Case, USD | Sources                             |
|-----------------------------------------------------------|----------------------------|--------------------------------------|--------------------|-------------------------------------|
| Hospitalization                                           | NA                         | NA                                   | 4996.04            | Leshem et al (2014) <sup>108b</sup> |
| ED visit                                                  | NA                         | 406.13                               |                    |                                     |
| Outpatient visit                                          | NA                         | NA                                   | 86.36              |                                     |
| NMA case                                                  | NA                         | NA                                   | 0.00               |                                     |
| Percentage of medically attended cases resulting in death | 0.0043%                    | Widdowson et al (2007) <sup>35</sup> | NA                 |                                     |

ED, emergency department; PCE, personal consumption expenditures; NA, not applicable; NMA, nonmedically attended; USD.

<sup>a</sup> Case severity for rotavirus determined from incidence rates for each severity level.

<sup>b</sup> Inflated to 2019 USD using the US PCE healthcare inflation factor.

**SUPPLEMENTAL TABLE 18** Rubella Case Severity Distribution, Disease-Related Deaths, and Direct Medical Costs per Case

| Case Severity                                           | Case Severity Distribution, % |        |        |             |        |        | Sources                                                                                                                                                                                                                                       | Cost Per Case, USD                           | Sources                                                                                                                     |
|---------------------------------------------------------|-------------------------------|--------|--------|-------------|--------|--------|-----------------------------------------------------------------------------------------------------------------------------------------------------------------------------------------------------------------------------------------------|----------------------------------------------|-----------------------------------------------------------------------------------------------------------------------------|
|                                                         | Prevaccine                    |        |        | Postvaccine |        |        |                                                                                                                                                                                                                                               |                                              |                                                                                                                             |
|                                                         | <1 y                          | 1–14 y | ≥15 y  | <1 y        | 1–14 y | ≥15 y  |                                                                                                                                                                                                                                               |                                              |                                                                                                                             |
| CRS                                                     | 0.17                          | 0.00   | 0.00   | 88.89       | 0.00   | 0.00   | Prevaccine: Roush and Murphy (2007) <sup>4</sup> ; postvaccine: CDC (Pertusis), <sup>88</sup> CDC (2016 Annual Tables), <sup>85</sup> CDC (Hepatitis B), <sup>86</sup> Adams et al (2017), <sup>72</sup> and Adams et al (2016) <sup>71</sup> | 74 179                                       | Zhou et al (2004) <sup>33</sup> citing White et al (1985) <sup>156a</sup>                                                   |
| Complicated case                                        | 0.04                          | 0.04   | 30.05  | 0.04        | 0.04   | 30.05  | Zhou et al (2004) <sup>33</sup>                                                                                                                                                                                                               | <15 y: 26 037;<br>≥15 y: 1534                |                                                                                                                             |
| Uncomplicated case                                      | 99.79                         | 99.96  | 69.96  | 11.07       | 99.96  | 69.96  |                                                                                                                                                                                                                                               | 51                                           |                                                                                                                             |
| Percentage of CRS cases resulting in long-term sequelae |                               |        |        |             |        |        |                                                                                                                                                                                                                                               |                                              |                                                                                                                             |
| Intellectual disability – moderate                      | 27.1                          | 27.1   | 27.1   | 27.1        | 27.1   | 27.1   | Zhou et al (2004) <sup>33</sup>                                                                                                                                                                                                               | 46 546 (annual cost for 50-y duration)       | Zhou et al (2004) <sup>33</sup> citing Chambers and Wolman (1998) <sup>92</sup> and Prouty and Lakin (2000) <sup>128a</sup> |
| Intellectual disability – severe                        | 5.9                           | 5.9    | 5.9    | 5.9         | 5.9    | 5.9    |                                                                                                                                                                                                                                               | 122 974 (annual cost for 50-y duration)      |                                                                                                                             |
| Learning disabilities                                   | 47.0                          | 47.0   | 47.0   | 47.0        | 47.0   | 47.0   |                                                                                                                                                                                                                                               | 25 102 (annual cost applied from age 3–18 y) |                                                                                                                             |
| Percentage of cases resulting in death                  |                               |        |        |             |        |        |                                                                                                                                                                                                                                               |                                              |                                                                                                                             |
| CRS (first year)                                        | 10.600                        | 10.600 | 10.600 | 10.600      | 10.600 | 10.600 | Zhou et al (2004) <sup>33</sup>                                                                                                                                                                                                               | NA                                           | NA                                                                                                                          |

**SUPPLEMENTAL TABLE 19** Tetanus Case Severity Distribution, Disease-Related Deaths, and Direct Medical Costs per Case

| Case Severity                                             | Case Severity Distribution, % | Sources                            | Cost per Case, USD | Sources                                          |
|-----------------------------------------------------------|-------------------------------|------------------------------------|--------------------|--------------------------------------------------|
| Hospitalized case                                         | 100.0                         | Ekwueme et al (2000) <sup>41</sup> | 92 418.68          | Ekwueme et al (2000) <sup>41</sup>               |
| Outpatient visit                                          | 0.0                           |                                    | NA                 | citing Hatziaandreu et al (1994) <sup>104a</sup> |
| Percentage of medically attended cases resulting in death | 15.0                          | Zhou et al (2005) <sup>6</sup>     | NA                 |                                                  |

NA, not applicable; PCE, personal consumption expenditures; NMA, nonmedically attended.

<sup>a</sup> Inflated to 2019 USD using the US PCE healthcare inflation factor.**SUPPLEMENTAL TABLE 20** Varicella Case Severity Distribution, Disease-Related Deaths, and Direct Medical Costs per Case

| Case Severity, %                                                   | Case Severity Distribution, y |       |       |       |       |       |       | Sources                                                                                                                                                           | Cost per Case, USD                      | Sources                                                                                                                       |
|--------------------------------------------------------------------|-------------------------------|-------|-------|-------|-------|-------|-------|-------------------------------------------------------------------------------------------------------------------------------------------------------------------|-----------------------------------------|-------------------------------------------------------------------------------------------------------------------------------|
|                                                                    | <1                            | 1–4   | 5–9   | 10–14 | 15–19 | 20–29 | ≥30   |                                                                                                                                                                   |                                         |                                                                                                                               |
| Natural varicella                                                  | 52.6                          | 52.6  | 52.6  | 52.6  | 52.6  | 52.6  | 52.6  | MSD data on file (2021)                                                                                                                                           |                                         |                                                                                                                               |
| Hospitalization, uncomplicated varicella                           | 0.65                          | 0.23  | 0.11  | 0.22  | 0.22  | 2.11  | 2.11  | Zhou et al (2008) <sup>32</sup> citing MarketScan data, Lopez et al (2006), <sup>112</sup> Galil et al (2002), <sup>99</sup> and Berge et al (2000) <sup>77</sup> | 4234.89                                 | Zhou et al (2008) <sup>32</sup> citing MarketScan data, Lieu et al (1994), <sup>110</sup> and Zhou et al (2005) <sup>6a</sup> |
| Pneumonia                                                          | 0.33                          | 0.04  | 0.01  | 0.06  | 0.06  | 0.93  | 0.93  |                                                                                                                                                                   | 5378.83                                 |                                                                                                                               |
| Encephalitis                                                       | 0.02                          | 0.01  | 0.01  | 0.04  | 0.04  | 0.12  | 0.12  |                                                                                                                                                                   | 15 402.38                               |                                                                                                                               |
| ED visit                                                           | 1.5                           | 0.4   | 0.2   | 0.1   | 0.4   | 0.8   | 2.4   |                                                                                                                                                                   | 233.68                                  |                                                                                                                               |
| Outpatient visit                                                   | 78.8                          | 16.7  | 9.4   | 7.1   | 17.5  | 33.2  | 95.5  |                                                                                                                                                                   | 82.23                                   |                                                                                                                               |
| Breakthrough varicella (postvaccine only)                          | 47.4                          | 47.4  | 47.4  | 47.4  | 47.4  | 47.4  | 47.4  | NA                                                                                                                                                                |                                         |                                                                                                                               |
| Hospitalization, uncomplicated varicella                           | 0.1                           | 0.0   | 0.0   | 0.0   | 0.0   | 0.4   | 0.4   | Rates of complication and resource use are assumed to be 20% of those for natural varicella (Brisson and Edmunds, 2003) <sup>79</sup>                             | 4234.89                                 | Zhou et al (2008) <sup>32</sup> citing MarketScan data, Lieu et al (1994), <sup>110</sup> and Zhou et al (2005) <sup>6a</sup> |
| Pneumonia                                                          | 0.07                          | 0.01  | 0.00  | 0.01  | 0.01  | 0.19  | 0.19  |                                                                                                                                                                   | 5378.83                                 |                                                                                                                               |
| Encephalitis                                                       | 0.00                          | 0.00  | 0.00  | 0.01  | 0.01  | 0.02  | 0.02  |                                                                                                                                                                   | 15 402.38                               |                                                                                                                               |
| ED visit case                                                      | 0.3                           | 0.1   | 0.0   | 0.0   | 0.1   | 0.2   | 0.5   |                                                                                                                                                                   | 233.68                                  |                                                                                                                               |
| Outpatient case                                                    | 15.8                          | 3.3   | 1.9   | 1.4   | 3.5   | 6.6   | 19.1  |                                                                                                                                                                   | 82.23                                   |                                                                                                                               |
| Percentage of encephalitis cases resulting in long-term disability | 8.5                           | 8.5   | 8.5   | 8.5   | 8.5   | 8.5   | 8.5   | Fowler et al (2010) <sup>52</sup>                                                                                                                                 | 128 114 (annual cost for 50-y duration) | Zhou et al (2008) <sup>32</sup> citing Lieu et al (1994) <sup>110</sup>                                                       |
| Percentage of cases resulting in death                             |                               |       |       |       |       |       |       |                                                                                                                                                                   |                                         |                                                                                                                               |
| Natural varicella                                                  | 0.004                         | 0.001 | 0.001 | 0.002 | 0.006 | 0.021 | 0.021 | Zhou et al (2008) <sup>32</sup> citing Galil et al (2002) <sup>100</sup> and Berge et al (2000) <sup>77</sup>                                                     | NA                                      | NA                                                                                                                            |
| Breakthrough varicella                                             | 0.001                         | 0.000 | 0.000 | 0.000 | 0.001 | 0.004 | 0.004 |                                                                                                                                                                   | NA                                      | NA                                                                                                                            |

ED, emergency department; PCE, personal consumption expenditures; NA, not applicable.

<sup>a</sup> Inflated to 2019 USD using the US PCE healthcare inflation factor.

**SUPPLEMENTAL TABLE 21** Quality of Life Inputs

| Disease                                     | Disutility | Duration of Disutility, y              | QALY Loss                                 | Source                                                                                                                     |
|---------------------------------------------|------------|----------------------------------------|-------------------------------------------|----------------------------------------------------------------------------------------------------------------------------|
| Diphtheria                                  | 0.23       | 0.03                                   | 0.006                                     | Philipson et al (2017) <sup>52</sup> citing WHO (2004) <sup>137</sup> and CDC (2012) <sup>82</sup>                         |
| HepA                                        |            |                                        |                                           |                                                                                                                            |
| Liver transplant                            | 0.27       | Remaining lifetime                     | 0.270 per year                            | Dhankhar et al (2015) <sup>96</sup> citing Rein et al (2007), <sup>130</sup>                                               |
| Icteric case                                | 0.36       | Hospitalized: 0.19<br>Outpatient: 0.09 | Hospitalized: 0.066;<br>outpatient: 0.034 | Luyten et al (2011), <sup>113</sup> Chong et al (2003), <sup>93</sup><br>and Berge et al (2000) <sup>77</sup>              |
| Anicteric case                              | 0.17       | 0.01                                   | 0.001                                     |                                                                                                                            |
| HepB                                        |            |                                        |                                           |                                                                                                                            |
| Acute case                                  | 0.29       | 0.02                                   | 0.006                                     | Chahal et al (2019) <sup>91</sup>                                                                                          |
| Fulminant case                              | 0.62       | 0.04                                   | 0.024                                     |                                                                                                                            |
| Chronic HepB                                | 0.14       | Remaining lifetime                     | 0.14 per year                             |                                                                                                                            |
| Compensated cirrhosis                       | 0.33       | (or until transition)                  | 0.33 per year                             |                                                                                                                            |
| Decompensated cirrhosis                     | 0.62       |                                        | 0.620 per year                            |                                                                                                                            |
| Hepatocellular carcinoma                    | 0.56       | 0.560 per year                         |                                           |                                                                                                                            |
| Liver transplant                            | 0.35       | Remaining lifetime                     | 0.350 per year                            |                                                                                                                            |
| Hib                                         |            |                                        |                                           |                                                                                                                            |
| Hib infection                               | 0.62       | 0.03                                   | 0.017                                     | Philipson et al (2017) <sup>52</sup> citing WHO (2004) <sup>137</sup> and CDC (2014) <sup>83</sup>                         |
| Major cognitive difficulties                | 0.38       | Remaining lifetime                     | 0.380 per year                            | Oostenbrink et al (2002) <sup>126</sup>                                                                                    |
| Major hearing loss                          | 0.09       | Remaining lifetime                     | 0.090 per year                            | Oostenbrink et al (2002) <sup>126</sup>                                                                                    |
| Influenza                                   |            |                                        |                                           |                                                                                                                            |
| Hospitalized case                           | 0.076      | —                                      | 0.076                                     | Prosser et al (2006) <sup>43</sup>                                                                                         |
| Non-hospitalized case                       | 0.005      | —                                      | 0.005                                     |                                                                                                                            |
| Measles                                     |            |                                        |                                           |                                                                                                                            |
| Measles case                                | 0.15       | 0.04                                   | 0.006                                     | Philipson et al (2017) <sup>52</sup> citing WHO (2004) <sup>137</sup> and CDC (2015) <sup>84</sup>                         |
| Long-term disability caused by encephalitis | 0.56       | 50.00                                  | 0.560 per year                            |                                                                                                                            |
| Mumps                                       | 0.15       | 0.03                                   | 0.004                                     | Philipson et al (2017) <sup>52</sup> citing WHO (2004) <sup>137</sup> and National Health Service (Mumps) <sup>122</sup>   |
| Pertussis                                   | 0.19       | 0.08                                   | 0.015                                     | Philipson et al (2017) <sup>52</sup> citing Greer and Fisman (2011) <sup>101</sup> and CDC (2015) <sup>84</sup>            |
| Pneumococcal disease                        |            |                                        |                                           |                                                                                                                            |
| IPD meningitis                              | 0.023      | 1.0                                    | 0.023                                     | Rubin et al (2010) <sup>45</sup> citing Bennett et al (2000) <sup>76</sup> and Oh et al (1996) <sup>125</sup>              |
| IPD bacteremia                              | 0.008      | 1.0                                    | 0.008                                     |                                                                                                                            |
| All-cause pneumonia hospitalizations        | 0.006      | 1.0                                    | 0.006                                     |                                                                                                                            |
| All-cause pneumonia outpatient visits       | 0.004      | 1.0                                    | 0.004                                     |                                                                                                                            |
| All-cause acute otitis media                | 0.005      | 1.0                                    | 0.005                                     |                                                                                                                            |
| Major cognitive difficulties                | 0.380      | Remaining lifetime                     | 0.380 per year                            | Oostenbrink et al (2002) <sup>126</sup>                                                                                    |
| Major hearing loss                          | 0.090      | Remaining lifetime                     | 0.090 per year                            | Oostenbrink et al (2002) <sup>126</sup>                                                                                    |
| Polio                                       |            |                                        |                                           |                                                                                                                            |
| Paralytic polio                             | 0.369      | 0.50                                   | 0.185                                     | Khan and Ehreth (2003), <sup>106</sup> Harvard Medical School (2019) <sup>103</sup>                                        |
| Permanent paralysis                         | 0.369      | Remaining lifetime                     | 0.369 per year                            | Khan and Ehreth (2003) <sup>106</sup>                                                                                      |
| Nonparalytic polio                          | 0.001      | 1.00                                   | 0.001                                     | Prosser et al (2006) <sup>43</sup>                                                                                         |
| Rotavirus                                   |            |                                        |                                           |                                                                                                                            |
| Hospitalization                             | 0.58       | 0.01                                   | 0.003                                     | Martin et al (2009) <sup>50</sup> citing Martin et al (2008) <sup>115</sup>                                                |
| ED visit                                    | 0.22       | 0.02                                   | 0.004                                     |                                                                                                                            |
| Outpatient visit                            | 0.22       | 0.02                                   | 0.004                                     |                                                                                                                            |
| Nonmedically attended case                  | 0.22       | 0.01                                   | 0.003                                     |                                                                                                                            |
| Rubella                                     |            |                                        |                                           |                                                                                                                            |
| Rubella infection                           | 0.15       | 0.02                                   | 0.003                                     | Philipson et al (2017) <sup>52</sup> citing WHO (2004) <sup>137</sup> and National Health Service (Rubella) <sup>121</sup> |
| CRS                                         | 0.35       | Remaining lifetime                     | 0.350 per year                            | Philipson et al (2017) <sup>52</sup> citing WHO (2004) <sup>137</sup>                                                      |
| Tetanus                                     | 0.64       | 0.08                                   | 0.049                                     | Philipson et al (2017) <sup>52</sup> citing WHO (2004) <sup>137</sup> and CDC (2015) <sup>84</sup>                         |
| Varicella                                   |            |                                        |                                           |                                                                                                                            |
| Natural varicella                           | 0.005      | 1.00                                   | 0.005                                     | Zhou et al (2008) <sup>32</sup> citing Brisson and Edmunds (2003) <sup>80</sup>                                            |
| Breakthrough varicella                      | 0.001      | 1.00                                   | 0.001                                     |                                                                                                                            |
| Long-term disability caused by encephalitis | 0.560      | 50.00                                  | 0.560 per year                            |                                                                                                                            |

ABCs, Active Bacterial Core surveillance; CDC, Centers for Disease Control and Prevention; NNDSS, National Notifiable Diseases Surveillance System; WHO, World Health Organization; —, not applicable.

**SUPPLEMENTAL TABLE 22** Productivity Loss per Case, by Disease

| Disease                                             | Productivity Lost<br>per Case, d | Sources and Assumptions                                                                                                                                                                                                                                                                                                                                                                                                                       |
|-----------------------------------------------------|----------------------------------|-----------------------------------------------------------------------------------------------------------------------------------------------------------------------------------------------------------------------------------------------------------------------------------------------------------------------------------------------------------------------------------------------------------------------------------------------|
| Diphtheria                                          | 6.1                              | Zhou et al (2014) <sup>7</sup>                                                                                                                                                                                                                                                                                                                                                                                                                |
| Tetanus                                             | 16.7                             | Zhou et al (2014) <sup>7</sup>                                                                                                                                                                                                                                                                                                                                                                                                                |
| Pertussis                                           |                                  |                                                                                                                                                                                                                                                                                                                                                                                                                                               |
| Hospitalized                                        | 10.3                             | Zhou et al (2014) <sup>7</sup>                                                                                                                                                                                                                                                                                                                                                                                                                |
| Outpatient                                          | 1.0                              | Assumption                                                                                                                                                                                                                                                                                                                                                                                                                                    |
| NMA                                                 | 0.5                              | Assumption                                                                                                                                                                                                                                                                                                                                                                                                                                    |
| HepA                                                |                                  |                                                                                                                                                                                                                                                                                                                                                                                                                                               |
| Anicteric                                           | 1.5                              | Hankin-Wei et al (2016) <sup>34</sup>                                                                                                                                                                                                                                                                                                                                                                                                         |
| Icteric, hospitalized                               | 33.2                             | MSD data on file (2020); based on data from Berge et al (2000) <sup>77</sup>                                                                                                                                                                                                                                                                                                                                                                  |
| Icteric, outpatient                                 | 15.5                             |                                                                                                                                                                                                                                                                                                                                                                                                                                               |
| HepB                                                |                                  | Assumed same as for HepA cases; individuals who developed decompensated cirrhosis and HCC were assumed to incur a full year of productivity loss (Barbosa et al 2014) <sup>75</sup>                                                                                                                                                                                                                                                           |
| Hospitalized (including fulminant)                  | 33.2                             |                                                                                                                                                                                                                                                                                                                                                                                                                                               |
| Outpatient                                          | 15.5                             |                                                                                                                                                                                                                                                                                                                                                                                                                                               |
| Decompensated cirrhosis                             | 365                              |                                                                                                                                                                                                                                                                                                                                                                                                                                               |
| HCC                                                 | 365                              |                                                                                                                                                                                                                                                                                                                                                                                                                                               |
| Hib                                                 |                                  | Zhou et al (2002) <sup>141</sup> ; productivity lost for hospitalized cases was assumed to be equal to the length of hospitalization (days) reported in Zhou et al (2002) <sup>140</sup> ; nonhospitalized cases were assumed to incur 1 caregiver day of time lost; an average number of caregiver days lost per Hib outcome was calculated based on the hospitalization rate for Hib outcomes reported in Zhou et al (2002). <sup>141</sup> |
| Meningitis                                          | 7.2                              |                                                                                                                                                                                                                                                                                                                                                                                                                                               |
| Epiglottitis                                        | 4.3                              |                                                                                                                                                                                                                                                                                                                                                                                                                                               |
| Bacteremia                                          | 3.0                              |                                                                                                                                                                                                                                                                                                                                                                                                                                               |
| Pneumonia                                           | 4.8                              |                                                                                                                                                                                                                                                                                                                                                                                                                                               |
| Cellulitis                                          | 2.1                              |                                                                                                                                                                                                                                                                                                                                                                                                                                               |
| Arthritis                                           | 1.5                              |                                                                                                                                                                                                                                                                                                                                                                                                                                               |
| Other invasive disease                              | 3.2                              |                                                                                                                                                                                                                                                                                                                                                                                                                                               |
| Influenza                                           | 1.1                              | Li and Leader (2007) <sup>109</sup>                                                                                                                                                                                                                                                                                                                                                                                                           |
| Measles                                             |                                  | Zhou et al (2004) <sup>33</sup>                                                                                                                                                                                                                                                                                                                                                                                                               |
| Encephalitis                                        | 8.7                              |                                                                                                                                                                                                                                                                                                                                                                                                                                               |
| Pneumonia                                           | 4.5                              |                                                                                                                                                                                                                                                                                                                                                                                                                                               |
| Otitis media                                        | 4.0                              |                                                                                                                                                                                                                                                                                                                                                                                                                                               |
| Uncomplicated or diarrhea case                      | 3.5                              |                                                                                                                                                                                                                                                                                                                                                                                                                                               |
| Mumps                                               |                                  | Zhou et al (2004) <sup>33</sup>                                                                                                                                                                                                                                                                                                                                                                                                               |
| Complicated                                         | 5.6                              |                                                                                                                                                                                                                                                                                                                                                                                                                                               |
| Uncomplicated                                       | 4.0                              |                                                                                                                                                                                                                                                                                                                                                                                                                                               |
| Rubella                                             |                                  | Zhou et al (2004) <sup>33</sup>                                                                                                                                                                                                                                                                                                                                                                                                               |
| Complicated                                         | 5.1                              |                                                                                                                                                                                                                                                                                                                                                                                                                                               |
| Uncomplicated                                       | 2.8                              |                                                                                                                                                                                                                                                                                                                                                                                                                                               |
| Pneumococcal disease                                |                                  |                                                                                                                                                                                                                                                                                                                                                                                                                                               |
| IPD Meningitis                                      | 10.6                             | Lieu et al (2000) <sup>111</sup>                                                                                                                                                                                                                                                                                                                                                                                                              |
| IPD Bacteremia                                      | 2.2                              | Lieu et al (2000) <sup>111</sup>                                                                                                                                                                                                                                                                                                                                                                                                              |
| Hospitalized pneumococcal pneumonia                 | 1.9                              | Lieu et al (2000) <sup>111</sup>                                                                                                                                                                                                                                                                                                                                                                                                              |
| Outpatient pneumococcal pneumonia                   | 1.0                              | Assumption                                                                                                                                                                                                                                                                                                                                                                                                                                    |
| AOM - complex                                       | 4.4                              | Lieu et al (2000) <sup>111</sup>                                                                                                                                                                                                                                                                                                                                                                                                              |
| AOM - simple                                        | 1.0                              | Estimated from Lieu et al (2000) <sup>111</sup> and Ray et al (2006) <sup>129</sup>                                                                                                                                                                                                                                                                                                                                                           |
| Polio                                               |                                  |                                                                                                                                                                                                                                                                                                                                                                                                                                               |
| Paralytic                                           | 182.6                            | Assumed 6 mo caregiver time loss based on Harvard Medical School (2019) <sup>103</sup> estimate of 6 mo to 2 y for return of motor function                                                                                                                                                                                                                                                                                                   |
| Nonparalytic                                        | 0.5                              | Assumed 0.5 d work loss based on CDC ("What is polio?") <sup>88</sup> estimate that about 25% of cases of polio result in flu-like symptoms for 2 to 5 days                                                                                                                                                                                                                                                                                   |
| Rotavirus                                           |                                  |                                                                                                                                                                                                                                                                                                                                                                                                                                               |
| Hospitalized                                        | 1.6                              | Mast et al (2010) <sup>116</sup> ; caregiver time lost for hospitalized cases was equal to the length of the hospitalization (1.6 d) reported in Mast et al (2010) <sup>116</sup> to avoid potential double-counting for hospitalized cases first treated in outpatient or ED setting                                                                                                                                                         |
| ED                                                  | 1.8                              |                                                                                                                                                                                                                                                                                                                                                                                                                                               |
| Outpatient                                          | 1.7                              |                                                                                                                                                                                                                                                                                                                                                                                                                                               |
| NMA                                                 | 1.0                              | Widdowson et al (2007) <sup>35</sup>                                                                                                                                                                                                                                                                                                                                                                                                          |
| Varicella                                           |                                  |                                                                                                                                                                                                                                                                                                                                                                                                                                               |
| Natural varicella (hospitalized or outpatient)      | <15 y: 0.6; ≥15 y: 5.7           | Calculated based on rates of hospitalization from Zhou et al (2008) <sup>32</sup> and workdays lost for inpatient and outpatient cases estimated in Brisson and Edmunds (2003) <sup>80</sup>                                                                                                                                                                                                                                                  |
| Breakthrough varicella (hospitalized or outpatient) | <15 y: 0.6; ≥15 y: 5.7           |                                                                                                                                                                                                                                                                                                                                                                                                                                               |

**SUPPLEMENTAL TABLE 22** Continued

| Disease      | Productivity Lost<br>per Case, d | Sources and Assumptions                                                                                     |
|--------------|----------------------------------|-------------------------------------------------------------------------------------------------------------|
| Encephalitis | 8.7                              | Assumed equal to length of measles encephalitis hospitalization reported by Zhou et al (2004) <sup>33</sup> |
| Pneumonia    | 4.5                              | Assumed equal to length of measles pneumonia hospitalization reported by Zhou et al (2004) <sup>33</sup>    |

AOM, acute otitis media; ED, emergency department; HCC, hepatocellular carcinoma; NMA, nonmedically attended.

**SUPPLEMENTAL TABLE 23** Percent Reduction in Annual Productivity for Long-Term Complications

| Disease                                     | Reduction in Annual Productivity, % |
|---------------------------------------------|-------------------------------------|
| HepA                                        |                                     |
| Liver transplant                            | 27.0                                |
| HepB                                        |                                     |
| Chronic HepB                                | 14.0                                |
| Compensated cirrhosis                       | 33.0                                |
| Decompensated cirrhosis                     | 62.0                                |
| HCC                                         | 56.0                                |
| Liver transplant                            | 35.0                                |
| Hib                                         |                                     |
| Major cognitive difficulties                | 38.0                                |
| Major hearing loss                          | 9.0                                 |
| Measles                                     |                                     |
| Long-term disability caused by encephalitis | 56.0                                |
| Rubella                                     |                                     |
| CRS                                         | 35.0                                |
| Varicella                                   |                                     |
| Long-term disability caused by encephalitis | 56.0                                |

Long-term complications were assumed to incur a percentage reduction in annual caregiver or patient productivity for patients' remaining lifetime or the duration of the complication. The percentage reduction in annual productivity values were assumed to be equal to the disutility (ie, percentage reduction in health-related quality-of-life) values applied for each long-term complication. CRS, congenital rubella syndrome; HCC, hepatocellular carcinoma.

**SUPPLEMENTAL TABLE 24** Market and Nonmarket Productivity, by Age Group

| Age Group, y | Annual Productivity, USD <sup>a</sup> | Daily Productivity, USD <sup>b</sup> | Sources and Assumptions                                                                                                                                                                                                                                                                                                                                                                                                                                                                                                                         |
|--------------|---------------------------------------|--------------------------------------|-------------------------------------------------------------------------------------------------------------------------------------------------------------------------------------------------------------------------------------------------------------------------------------------------------------------------------------------------------------------------------------------------------------------------------------------------------------------------------------------------------------------------------------------------|
| 0–14         | 0                                     | 169.93                               | Annual age-specific market productivity (for value of time lost from work) and nonmarket productivity (for value of time lost from household and volunteer activities) estimates were obtained from Grosse et al (2019). <sup>31</sup> Productivity amounts were inflated to 2019 USD using the employment cost index US Bureau of Labor Statistics (2019). <sup>23</sup> Daily productivity costs for caregivers are based on the average daily productivity for people aged 15 years and over, weighted by 2017 population size for each age. |
| 15–24        | 21 798                                | 59.72                                |                                                                                                                                                                                                                                                                                                                                                                                                                                                                                                                                                 |
| 25–34        | 69 922                                | 191.57                               |                                                                                                                                                                                                                                                                                                                                                                                                                                                                                                                                                 |
| 35–44        | 94 068                                | 257.72                               |                                                                                                                                                                                                                                                                                                                                                                                                                                                                                                                                                 |
| 45–54        | 90 102                                | 246.85                               |                                                                                                                                                                                                                                                                                                                                                                                                                                                                                                                                                 |
| 55–64        | 73 494                                | 201.35                               |                                                                                                                                                                                                                                                                                                                                                                                                                                                                                                                                                 |
| 65–74        | 41 621                                | 114.03                               |                                                                                                                                                                                                                                                                                                                                                                                                                                                                                                                                                 |
| 75–89        | 17 314                                | 47.43                                |                                                                                                                                                                                                                                                                                                                                                                                                                                                                                                                                                 |
| 90–100       | 0                                     | 0.00                                 |                                                                                                                                                                                                                                                                                                                                                                                                                                                                                                                                                 |

<sup>a</sup> Annual productivity estimates were used to calculate indirect costs (discounted lifetime productivity loss) of disease-related mortality (Supplemental Table 25).

<sup>b</sup> Daily productivity estimates were used to calculate indirect costs of time spent with disease cases and caregiver time for vaccination.

**SUPPLEMENTAL TABLE 25** Age-Specific Life Expectancy and Calculated Lifetime Productivity Lost from Premature Death

| Age, y           | Probability of All-Cause Mortality <sup>a</sup> | Remaining Life Expectancy, y <sup>b</sup> | Discounted Lifetime Productivity Lost for Deaths, USD <sup>c</sup> |
|------------------|-------------------------------------------------|-------------------------------------------|--------------------------------------------------------------------|
| <1               | 0.003931                                        | 78.6                                      | 1 050 863                                                          |
| 10               | 0.000093                                        | 69.1                                      | 1 423 405                                                          |
| 20               | 0.000795                                        | 59.4                                      | 1 799 992                                                          |
| 30               | 0.001351                                        | 49.9                                      | 1 922 680                                                          |
| 40               | 0.001936                                        | 40.7                                      | 1 660 684                                                          |
| 50               | 0.004030                                        | 31.6                                      | 1 187 093                                                          |
| 60               | 0.009093                                        | 23.2                                      | 688 413                                                            |
| 70               | 0.018428                                        | 15.7                                      | 301 582                                                            |
| 80               | 0.048163                                        | 9.1                                       | 108 207                                                            |
| 90               | 0.141733                                        | 4.4                                       | 0                                                                  |
| 100 <sup>d</sup> | 1.000000                                        | 0.5                                       | 0                                                                  |

<sup>a</sup> CDC ("Underlying Cause of Death 1999-2017").<sup>55</sup>

<sup>b</sup> Arias and Xu (2019).<sup>56</sup>

<sup>c</sup> Calculated using age-specific data (by 1-year intervals, not all shown here) and discounted with an annual rate of 3%. Annual productivity is assumed to be \$0 for ages 90 years and older.

<sup>d</sup> Calculations for death truncated at age 100.

# Supplemental References

71. Adams DA, Thomas KR, Jajosky RA, et al; Nationally Notifiable Infectious Conditions Group. Summary of notifiable infectious diseases and conditions - United States, 2014. *MMWR Morb Mortal Wkly Rep*. 2016;63(54):1–152
72. Adams DA, Thomas KR, Jajosky RA, et al; Nationally Notifiable Infectious Conditions Group. Summary of notifiable infectious diseases and conditions - United States, 2015. *MMWR Morb Mortal Wkly Rep*. 2017;64(53):1–143
73. Arevalo JA, Washington AE. Cost-effectiveness of prenatal screening and immunization for hepatitis B virus. *JAMA*. 1988;259(3):365–369
74. Armstrong GL, Bell BP. Hepatitis A virus infections in the United States: model-based estimates and implications for childhood immunization. *Pediatrics*. 2002;109(5):839–845
75. Barbosa C, Smith EA, Hoerger TJ, et al. Cost-effectiveness analysis of the national Perinatal Hepatitis B Prevention Program. *Pediatrics*. 2014;133(2):243–253
76. Bennett JE, Sumner W II, Downs SM, Jaffe DM. Parents' utilities for outcomes of occult bacteremia. *Arch Pediatr Adolesc Med*. 2000;154(1):43–48
77. Berge JJ, Drennan DP, Jacobs RJ, et al. The cost of hepatitis A infections in American adolescents and adults in 1997. *Hepatology*. 2000;31(2):469–473
78. Bohlke K, Davis RL, Marcy SM, et al; Vaccine Safety Datalink Team. Risk of anaphylaxis after vaccination of children and adolescents. *Pediatrics*. 2003;112(4):815–820
79. Boyle CA, Decoufle P, Yeargin-Allsopp M. Prevalence and health impact of developmental disabilities in US children. *Pediatrics*. 1994;93(3):399–403
80. Brisson M, Edmunds WJ. Varicella vaccination in England and Wales: cost-utility analysis. *Arch Dis Child*. 2003;88(10):862–869
81. Centers for Disease Control and Prevention (CDC). Summary of notifiable diseases, United States, 1999. *MMWR Morb Mortal Wkly Rep*. 2001; 48(53):89–98
82. Centers for Disease Control and Prevention (CDC). *Manual for the Surveillance of Vaccine-Preventable Diseases*. Atlanta, GA: Centers for Disease Control and Prevention; 2012
83. Centers for Disease Control and Prevention (CDC). *Haemophilus Influenzae Disease (including Hib): Diagnosis and Treatment*. Atlanta, GA: Centers for Disease Control and Prevention; 2014
84. Centers for Disease Control and Prevention (CDC). In: Hamborsky J, Kroger A, Wolfe S, eds. *Epidemiology and Prevention of Vaccine-Preventable Diseases*, 13th ed. Washington, DC: Public Health Foundation; 2015
85. Centers for Disease Control and Prevention (CDC). National notifiable diseases surveillance system. 2016 annual tables of infectious diseases data. Available at: <https://wwwn.cdc.gov/nndss/infectious-tables.html>. Accessed May 1, 2020
86. Centers for Disease Control and Prevention (CDC). Hepatitis B questions and answers for health professionals. Available at: <https://www.cdc.gov/hepatitis/hbv/hbvfaq.htm>. Accessed April 23, 2019
87. Centers for Disease Control and Prevention (CDC). National notifiable diseases surveillance system. 2017 annual tables of infectious diseases data. Available at: <https://www.cdc.gov/nndss/infectious-tables.html>. Accessed April 2, 2019
88. Centers for Disease Control and Prevention (CDC). What is polio? Available at: <https://www.cdc.gov/polio/what-is-polio/index.htm>. Accessed June 30, 2020
89. Centers for Disease Control and Prevention (CDC). 2017-2018 estimated influenza illnesses, medical visits, hospitalizations, and deaths and estimated influenza illnesses, medical visits, hospitalizations, and deaths averted by vaccination in the United States. Available at: <https://www.cdc.gov/flu/about/burden-averted/> 2017-2018.htm. Accessed May 16, 2020
90. Centers for Disease Control and Prevention (CDC). Pertussis (whooping cough): surveillance and reporting. Available at: <https://www.cdc.gov/pertussis/surv-reporting.html>. Accessed June 5, 2020
91. Chahal HS, Peters MG, Harris AM, McCabe D, Volberding P, Kahn JG. Cost-effectiveness of hepatitis B virus infection screening and treatment or vaccination in 6 high-risk populations in the United States. *Open Forum Infect Dis*. 2018;6(1):ofy353
92. Chambers JG, Wolman JM. *What Can We Learn From State Data Systems About the Cost of Special Education: A Case Study of Ohio. Report: The Center for Special Education Finance (CSEF)*. Palo Alto, CA: American Institutes for Research; 1998
93. Chong CA, Gulamhussein A, Heathcote EJ, et al. Health-state utilities and quality of life in hepatitis C patients. *Am J Gastroenterol*. 2003;98(3):630–638
94. Christie D, Rashid H, El-Bashir H, et al. Impact of meningitis on intelligence and development: a systematic review and meta-analysis. *PLoS One*. 2017; 12(8):e0175024
95. Cochi SL, Broome CV, Hightower AW. Immunization of US children with Hemophilus influenzae type b polysaccharide vaccine. a cost-effectiveness model of strategy assessment. *JAMA*. 1985;253(4):521–529
96. Dhankhar P, Nwankwo C, Pillsbury M, et al. Public health impact and cost-effectiveness of hepatitis A vaccination in the United States: a disease transmission dynamic modeling approach. *Value Health*. 2015;18(4):358–367
97. Duintjer Tebbens RJ, Pallansch MA, Cochi SL, et al. Economic analysis of the global polio eradication initiative. *Vaccine*. 2010;29(2):334–343
98. Erlewyn-Lajeunesse M, Hunt LP, Heath PT, Finn A. Anaphylaxis as an adverse event following immunisation in the UK and Ireland. *Arch Dis Child*. 2012;97(6):487–490
99. Farizo KM, Cochi SL, Zell ER, Brink EW, Wassilak SG, Patriarca PA. Epidemiological features of pertussis in the United States, 1980-1989. *Clin Infect Dis*. 1992;14(3):708–719
100. Galil K, Brown C, Lin F, Seward J. Hospitalizations for varicella in the United States, 1988 to 1999. *Pediatr Infect Dis J*. 2002;21(10):931–935

101. Greer AL, Fisman DN. Use of models to identify cost-effective interventions: pertussis vaccination for pediatric health care workers. *Pediatrics*. 2011;128(3):e591–e599
102. Hart RJ, Stevenson MD, Smith MJ, LaJoie AS, Cross K. Cost-effectiveness of strategies for offering influenza vaccine in the pediatric emergency department. *JAMA Pediatr*. 2018;172(1):e173879
103. Harvard Medical School. Polio: what is it?. Available at: [https://www.health.harvard.edu/a\\_to\\_z/polio-a-to-z#:~:text=The%20fever%20and%20other%20symptoms,can%20continue%20for%20two%20years](https://www.health.harvard.edu/a_to_z/polio-a-to-z#:~:text=The%20fever%20and%20other%20symptoms,can%20continue%20for%20two%20years). Accessed June 30, 2020
104. Hatziaandreu E, Palmer CS, Brown RE, Halpern MT. *A Cost-Benefit Analysis of the Diphtheria-Tetanus-Pertussis (DTP) Vaccine: Report Prepared for the Centers for Disease Control and Prevention*. Arlington, VA: Battelle Inc.; 1994
105. Hayes BH, Haberling DL, Kennedy JL, Varma JK, Fry AM, Vora NM. Burden of pneumonia-associated hospitalizations: United States, 2001-2014. *Chest*. 2018;153(2):427–437
106. Khan MM, Ehreth J. Costs and benefits of polio eradication: a long-run global perspective. *Vaccine*. 2003;21(7-8):702–705
107. Krahn M, Detsky AS. Should Canada and the United States universally vaccinate infants against hepatitis B? a cost-effectiveness analysis. *Med Decis Making*. 1993;13(1):4–20
108. Leshem E, Moritz RE, Curns AT, et al. Rotavirus vaccines and health care utilization for diarrhea in the United States (2007-2011). *Pediatrics*. 2014;134(1):15–23
109. Li S, Leader S. Economic burden and absenteeism from influenza-like illness in healthy households with children (5-17 years) in the US. *Respir Med*. 2007;101(6):1244–1250
110. Lieu TA, Cochi SL, Black SB, et al. Cost-effectiveness of a routine varicella vaccination program for US children. *JAMA*. 1994;271(5):375–381
111. Lieu TA, Ray GT, Black SB, et al. Projected cost-effectiveness of pneumococcal conjugate vaccination of healthy infants and young children. *JAMA*. 2000;283(11):1460–1468
112. Lopez AS, Guris D, Zimmerman L, et al. One dose of varicella vaccine does not prevent school outbreaks: is it time for a second dose? *Pediatrics*. 2006;117(6):e1070–e1077
113. Luyten J, Marais C, Hens N, De Schrijver K, Beutels P. Imputing QALYs from single time point health state descriptions on the EQ-5D and the SF-6D: a comparison of methods for hepatitis A patients. *Value Health*. 2011;14(2):282–290
114. Margolis HS, Coleman PJ, Brown RE, Mast EE, Sheingold SH, Arevalo JA. Prevention of hepatitis B virus transmission by immunization: an economic analysis of current recommendations. *JAMA*. 1995;274(15):1201–1208
115. Martin A, Cottrell S, Standaert B. Estimating utility scores in young children with acute rotavirus gastroenteritis in the UK. *J Med Econ*. 2008;11(3):471–484
116. Mast TC, Walter EB, Bulotsky M, et al. Burden of childhood rotavirus disease on health systems in the United States. *Pediatr Infect Dis J*. 2010;29(2):e19–e25
117. McNeil MM, Weintraub ES, Duffy J, et al. Risk of anaphylaxis after vaccination in children and adults. *J Allergy Clin Immunol*. 2016;137(3):868–878
118. Miriti MK, Billah K, Weinbaum C, et al. Economic benefits of hepatitis B vaccination at sexually transmitted disease clinics in the U.S. *Public Health Rep*. 2008;123(4):504–513
119. Moore MR, Link-Gelles R, Schaffner W, et al. Effect of use of 13-valent pneumococcal conjugate vaccine in children on invasive pneumococcal disease in children and adults in the USA: analysis of multisite, population-based surveillance. *Lancet Infect Dis*. 2015;15(3):301–309
120. Mulley AG, Silverstein MD, Dienstag JL. Indications for use of hepatitis B vaccine, based on cost-effectiveness analysis. *N Engl J Med*. 1982;307(11):644–652
121. National Health Service. Rubella, 2015a. Available at: <https://www.nhs.uk/conditions/rubella/>. Accessed November 21, 2019
122. National Health Service. Mumps, 2015b. Available at: <https://www.nhs.uk/conditions/mumps/>. Accessed November 21, 2019
123. National Spinal Cord Injury Statistics Center. Spinal cord injury (SCI): facts and figures at a glance. Available at: <https://www.nscisc.uab.edu/Public/Facts%202016.pdf>. Accessed November 21, 2019
124. Nguyen MH, Burak Ozbay A, Liou I, et al. Healthcare resource utilization and costs by disease severity in an insured national sample of US patients with chronic hepatitis B. *J Hepatol*. 2019;70(1):24–32
125. Oh PI, Maerov P, Pritchard D, Knowles SR, Einarson TR, Shear NH. A cost-utility analysis of second-line antibiotics in the treatment of acute otitis media in children. *Clin Ther*. 1996;18(1):160–182
126. Oostenbrink R, A Moll HA, Essink-Bot ML. The EQ-5D and the Health Utilities Index for permanent sequelae after meningitis: a head-to-head comparison. *J Clin Epidemiol*. 2002;55(8):791–799
127. Pelletier L, Chung P, Duclos P, Manga P, Scott J. A benefit-cost analysis of two-dose measles immunization in Canada. *Vaccine*. 1998;16(9-10):989–996
128. Prouty R, Lakin KC. *Residential Services for Persons With Developmental Disabilities: Status and Trends Through 1999. Report #54*. Minneapolis, MN: Institute on Community Integration, University of Minnesota; 2000
129. Ray GT, Whitney CG, Fireman BH, Ciurly V, Black SB. Cost-effectiveness of pneumococcal conjugate vaccine: evidence from the first 5 years of use in the United States incorporating herd effects. *Pediatr Infect Dis J*. 2006;25(6):494–501
130. Rein DB, Hicks KA, Wirth KE, et al. Cost-effectiveness of routine childhood vaccination for hepatitis A in the United States. *Pediatrics*. 2007;119(1):e12–e21
131. Rolfes MA, Flannery B, Chung JR, et al; US Influenza Vaccine Effectiveness (Flu VE) Network, the Influenza

- Hospitalization Surveillance Network, and the Assessment Branch, Immunization Services Division, Centers for Disease Control and Prevention. Effects of influenza vaccination in the United States during the 2017-2018 influenza season. *Clin Infect Dis*. 2019;69(11):1845–1853
132. Stoecker C, Kim L, Gierke R, Pilishvili T. Incremental cost-effectiveness of 13-valent pneumococcal conjugate vaccine for adults age 50 years and older in the United States. *J Gen Intern Med*. 2016;31(8):901–908
  133. Sutter RW, Cochi SL. Pertussis hospitalizations and mortality in the United States, 1985-1988. evaluation of the completeness of national reporting. *JAMA*. 1992;267(3):386–391
  134. Talbird SE, La EM, Poston SA, Hogeia CS. A budget-impact analysis of quadrivalent influenza vaccine use in the United States. *Value Health*. 2017;20(5):A78
  135. US Department of Health and Human Services. National inpatient sample, Healthcare Cost and Utilization Project 2003. Available at: <http://hcupnet.ahrq.gov>. Accessed August 26, 2005
  136. White CC, Koplan JP, Orenstein WA. Benefits, risks and costs of immunization for measles, mumps and rubella. *Am J Public Health*. 1985;75(7):739–744
  137. World Health Organization. *Global Burden of Disease 2004 Update: Disability Weights for Diseases and Conditions*. Geneva, Switzerland: World Health Organization; 2004
  138. World Health Organization . Poliomyelitis. Available at: <https://www.who.int/en/news-room/fact-sheets/detail/poliomyelitis>. Accessed April 30, 2019
  139. Wolfe RA, Merion RM, Roys EC, Port FK. Trends in organ donation and transplantation in the United States, 1998-2007. *Am J Transplant*. 2009;9(4 Pt 2):869–878
  140. Wuerth BA, Bonnewell JP, Wiemken TL, Arnold FW. Trends in pneumonia mortality rates and hospitalizations by organism, United States, 2002-2011(1). *Emerg Infect Dis*. 2016;22(9):1624–1627
  141. Zhou F, Bisgard KM, Yusuf HR, Deuson RR, Bath SK, Murphy TV. Impact of universal Haemophilus influenzae type b vaccination starting at 2 months of age in the United States: an economic analysis. *Pediatrics*. 2002;110(4):653–661
